# Supplementary material for: Targeting CD38 with isatuximab and a novel CD38/CD3×CD28 trispecific T-cell engager in older patients with acute myeloid leukemia
Source: PubMed Central journal article supplement — Blood Adv. 2024 Jun 3;8(15):3875–9. doi: 10.1182/bloodadvances.2024013212 (PMC11321322; doi:10.1182/bloodadvances.2024013212), 2024-06-03

# **Targeting CD38 with isatuximab and a novel CD38/CD3xCD28 trispecific T-cell engager in older patients with acute myeloid leukemia**

**Running head:** The role of CD38 as a potential target in AML

**Authors:** Esperanza Martín-Sánchez,<sup>1\*</sup> Laura Blanco,<sup>1</sup> Peter S. Kim,<sup>2</sup> Kamlesh Bisht,<sup>2</sup> Hongfang Wang,<sup>2</sup> Helgi Van de Velde,<sup>2</sup> Tomas Jelinek,<sup>1,3</sup> Catia Simoes,<sup>1</sup> Felipe Prosper,<sup>1</sup> Jesus F. San Miguel,<sup>1</sup> Ana, Alfonso<sup>1</sup>, Juan Bergua,<sup>4</sup> Rebeca Rodríguez-Veiga,<sup>5</sup> Susana Vives,<sup>6</sup> David Martínez-Cuadrón,<sup>5</sup> Pau Montesinos,<sup>5\*</sup> Bruno Paiva,<sup>1\*</sup> and Aintzane Zabaleta<sup>1\*</sup>

**Affiliations:** <sup>1</sup>Cancer Center Clínica Universidad de Navarra (CCUN), Centro de Investigación Médica Aplicada (CIMA), Instituto de Investigación Sanitaria de Navarra (IdiSNA), CIBER-ONC numbers CB16/12/00369 and CB16/12/00489, Pamplona, Spain; <sup>2</sup>Sanofi R&D, North America, Cambridge, MA, USA; <sup>3</sup>Department of Hematooncology, University Hospital of Ostrava, and Faculty of Medicine, University of Ostrava, Ostrava, Czech Republic; <sup>4</sup>Hospital San Pedro de Alcántara, Cáceres, Spain; <sup>5</sup>Hospital Universitario La Fe, Valencia, Spain; <sup>6</sup>ICO Badalona-Hospital Germans Trias I Pujol, Josep Carreras Research Institute, Badalona, Spain.

\*These authors have all contributed equally to this study and should be considered as last authors.

## **Address for correspondence:**

Bruno Paiva, Ph.D.

Cancer Center Clínica Universidad de Navarra (CCUN); Centro de Investigación Médica Aplicada (CIMA), Instituto de Investigación Sanitaria de Navarra (IdiSNA)

Av. Pío XII 55, 31008 Pamplona, Spain

e-mail: [bpaiva@unav.es](mailto:bpaiva@unav.es)

## TABLE OF CONTENTS

|                                                                                                                       |    |
|-----------------------------------------------------------------------------------------------------------------------|----|
| Supplemental Methods.....                                                                                             | 3  |
| CD38 expression in older patients with acute myeloid leukemia (AML).....                                              | 3  |
| Effector-cell abundance in BM samples from older AML patients .....                                                   | 4  |
| Antibody-dependent cellular cytotoxicity (ADCC) in AML cell lines.....                                                | 4  |
| Antibody-dependent cellular phagocytosis (ADCP) in AML cell lines .....                                               | 4  |
| <i>Ex vivo</i> efficacy of isatuximab in older AML patients .....                                                     | 5  |
| Analysis of the mechanisms of action triggered by isatuximab and the<br>CD38/CD3xCD28 trispecific TCE (CD38-TCE)..... | 6  |
| Comparison of the <i>ex vivo</i> efficacy of isatuximab and the CD38-TCE in AML.....                                  | 6  |
| Supplemental Tables .....                                                                                             | 9  |
| Supplemental Table 1.....                                                                                             | 9  |
| Supplemental Figures.....                                                                                             | 13 |
| Figure S1 .....                                                                                                       | 13 |
| Figure S2 .....                                                                                                       | 14 |
| Figure S3 .....                                                                                                       | 15 |
| Figure S4 .....                                                                                                       | 16 |
| Figure S5 .....                                                                                                       | 17 |
| Figure S6 .....                                                                                                       | 18 |

## Supplemental Methods

### CD38 expression in older patients with acute myeloid leukemia (AML)

CD38 expression was measured in the surface of leukemic cells from a series of 241 newly-diagnosed older patients (median age 75, range 65 – 90) enrolled in the phase 3 PETHEMA FLUGAZA clinical trial (NCT02319135)<sup>1</sup>. Briefly, patients were randomized to receive three induction cycles with fludarabine and cytarabine (FLUGA) followed by six consolidation cycles with reduced intensity of FLUGA, vs three induction cycles with 5-azacitidine (AZA) followed by six consolidation cycles with AZA. After consolidation, patients continued with the same treatment if measurable residual disease (MRD)  $\geq 0.01\%$ , or stopped if MRD  $< 0.01\%$ . At diagnosis, the EuroFlow AML panel was used to identify leukemia-associated immunophenotypes (LAIPs)<sup>2</sup>. When complete response was achieved, bone marrow (BM) samples were stained with 8-color combinations conserving the same design as that at diagnosis, selecting markers based on previously identified maturation arrest, lineage commitment and LAIPs to monitor MRD.

Multidimensional flow cytometry (MFC) was used to evaluate CD38 expression in the surface of leukemic cells. EDTA-anticoagulated BM samples were processed within 24 hours after collection following the EuroFlow lyse-wash-and-stain sample preparation protocol adjusted to  $10^6$  nucleated cells<sup>3</sup>. Blasts were identified based on their pattern of CD34, CD45, CD117 and HLADR expression, and the mean fluorescence intensity (MFI) and percentage of CD38<sup>+</sup> leukemic blasts were quantified for each patient, based on the fifth monoclonal antibody (mAb) combination of the EuroFlow AML panel<sup>3</sup>: Pacific Blue-HLADR, OC515-CD45, FITC-CD15, PE-NG2, PerCP-Cy5.5-CD34, PECy7-CD117, APC-CD22 and APCH7-CD38. Mature nucleated red blood cells (erythroblasts) were used as negative control for CD38 expression. Data acquisition was performed in a FACSCanto II flow cytometer [Beckton Dickinson Biosciences (BDB), San Jose, CA] using the FACSDiva 6.1 software (BDB). The Infinicyt software (Cytognos SL, Salamanca, Spain) was used to analyze data.

### **Effector-cell abundance in BM samples from older AML patients**

The presence and relative frequency of NK- and T-cells was determined in BM samples from the series of patients described above, using the first mAb combination of the EuroFlow AML panel<sup>3</sup>: Pacific Blue-HLADR, OC515-CD45, FITC-CD16, PE-CD13, PerCP-Cy5.5-CD34, PECy7-CD117, APC-CD11b and APCH7-CD10. Data was analyzed with a semi-automated pipeline that performs batch-analyses of flow cytometry data to avoid variability intrinsic to manual analysis, and unveils full cellular diversity based on unbiased clustering<sup>4</sup>. Briefly, this strategy allowed the systematic identification and quantification of a variable number of cell clusters, including NK cells (CD10<sup>-</sup>, CD13<sup>-</sup>, CD16<sup>++</sup>, CD11b<sup>+/-</sup>, CD34<sup>-</sup>, CD45<sup>+</sup>, CD117<sup>-</sup>, low FSC/SSC) and T cells (CD10<sup>-</sup>, CD13<sup>-</sup>, CD16<sup>-</sup>, CD34<sup>-</sup>, CD45<sup>+</sup>, CD117<sup>-</sup>, low FSC/SSC), which grouped according to the similarity of antigen expression profiles by using the bioinformatic algorithm FlowSOM.

### **Antibody-dependent cellular cytotoxicity (ADCC) in AML cell lines**

To determine isatuximab-induced (70 nM) killing of AML cell lines through ADCC, peripheral blood mononuclear cells (PBMC) from healthy adults were isolated by Ficoll-paque PLUS density gradient (GE Healthcare, Chicago, IL). Human NK cells were further purified by negative magnetic cell sorting in an AutoMACS Pro using the NK Cell Isolation Kit (Miltenyi Biotec, Bergisch Gladbach, Germany) following the manufacturer's protocol. Purified NK cells were cocultured in an effector to target cell (E:T) ratio of 1:1 with KG-1, MOLM-13 and OCI-AML3 AML cell lines. After overnight incubation, cells were stained with the mAb panel 1 indicated in the Supplemental Table 1. AML cell lysis was measured as the frequency of Annexin-V<sup>+</sup> AML cells.

### **Antibody-dependent cellular phagocytosis (ADCP) in AML cell lines**

To determine isatuximab-mediated ADCP, human CD14<sup>+</sup> monocytes were isolated from healthy adults' PBMC with CD14 MicroBeads Human kit (Miltenyi Biotec,

Bergisch Gladbach, Germany). Cell sorting was performed in an AutoMACS Pro and purified monocytes were resuspended in complete medium (RPMI1640, 10% fetal bovine serum (FBS), 1% L-Glutamine and 1% Penicillin/Streptomycin) supplemented with macrophage colony-stimulating factor (10 ng/mL), and seeded in 6-well plates at a density of  $1.5 \times 10^6$  cells/mL. Cells were kept in culture for 7 days, and medium with growth factors was replaced every 2 days. Differentiated macrophages were detached with 10 mM PBS-EDTA and cultured in 24-well plates in complete medium to allow macrophages to adhere to the plate. After overnight incubation, the culture medium was removed and RPMI1640 medium without FBS was added for two hours. KG-1, MOLM-13 and OCI-AML3 cell lines were labeled with violet proliferation dye (VPD) 450 (BD Horizon™, BDB, San Jose, CA) and treated with or without isatuximab (70 nM) for 30 minutes, before culturing with macrophages in a 1:2 E:T ratio. After 2 hours at 37 °C, cells were collected with 10 mM PBS-EDTA and labeled with mAb panel 2 (Supplemental Table 1). Isatuximab-mediated phagocytosis was determined as the frequency of CD14<sup>+</sup>, CD300e<sup>+</sup> and VPD<sup>+</sup> triple positive macrophages after exclusion of dead cells using sytox green staining. All samples were evaluated in a FACSCanto II flow cytometer using the FACSDiva 6.1 software (BDB, San Jose, CA). Data analysis was performed with the Infinicyt software (Cytognos SL, Salamanca, Spain).

### ***Ex vivo* efficacy of isatuximab in older AML patients**

We measured ADCC in primary samples from 17 patients with AML (median age 69, range 34 – 81) upon treatment with 70 nM of isatuximab for 24 hours, and using the panel 3 of mAbs (Supplemental Table 1). Live leukemic cells were identified after exclusion of debris and doublets based on their unique scatter characteristics, expression of CD34 and CD117, plus negative staining for Annexin-V. Untreated samples were used as control and depletion of leukemic cells was determined according to the following formula:  $[(\% \text{ leukemic cells in untreated} - \% \text{ of leukemic cells in treated sample}) / \% \text{ of leukemic cells in untreated}] * 100$ . Data acquisition was performed in a

FACSCanto II flow cytometer using the FACSDiva 6.1 (BDB, San Jose, CA) and the Infinicyt softwares (Cytognos SL, Salamanca, Spain) to analyze data.

### **Analysis of the mechanisms of action triggered by isatuximab and the CD38/CD3xCD28 trispecific TCE (CD38-TCE)**

To compare CD38 regulation, KG-1, MOLM-13 and OCI-AML3 cell lines were treated with isatuximab or the CD38-TCE (both at 70 nM) for 96 hours, and CD38 expression was analyzed every 24 hours by flow cytometry with a non-competing anti-CD38 antibody (clone 11B6, kindly provided by Sanofi).

MOLM-13 cells were stained with VPD and pre-treated with isatuximab or the CD38-TCE (700 pM) and their corresponding isotype controls for 30 minutes. Then, MOLM-13 cells were co-cultured with PBMC at a 10:1 E:T ratio for 24 and 48 hours. Alternatively, T- and NK- cells were further purified in an AutoMACS Pro using magnetic-bead assays for negative selection (Miltenyi Biotech, Bergisch Gladbach, Germany). Purified effector cells were co-cultured with VPD-labeled and drug pre-treated MOLM-13 cells at a 2:1 E:T ratio for 24 and 48 hours. At the indicated time-points, samples were harvested and labeled with the panel 4 of mAbs (Supplemental Table 1), to determine leukemic cell lysis, effector NK- and T-cell activation, as well as regulation of CD38 expression in MOLM-13 cells, as detailed above. Samples were acquired in an Omnicyt flow cytometer, and analyzed using the Infinicyt software (both from Cytognos SL, Salamanca, Spain).

### **Comparison of the *ex vivo* efficacy of isatuximab and the CD38-TCE in AML**

We measured tumor-cell killing in primary samples from eight patients with AML (median age 73, range 44 – 84), incubated for 48 hours in the presence of isatuximab or the CD38-TCE (7 – 700 pM) and their respective isotypes as controls. Before treatment, samples were labeled with two combinations of mAbs to determine the frequency of

leukemic blasts and other immune cell subsets (Supplemental Table 1, panel 5), and to characterize baseline immunophenotype of effector cells (Supplemental Table 1, panel 6). After treatment in 48-well plates, samples from each well were splitted into two aliquots and labeled with two combinations of mAbs to determine the effect on leukemic cells (Supplemental Table 1, panel 5) and other immune cell types (Supplemental Table 1, panel 7). Live leukemic cells were identified as detailed above. Samples treated with the isotype of either isatuximab or the CD38-null trispecific TCE were used as control, and depletion of leukemic cells was determined according to the following formula:  $[(\% \text{ leukemic cells in isotype} - \% \text{ of leukemic cells in treated sample}) / \% \text{ of leukemic cells in isotype}] * 100$ . Data acquisition was performed in a CytoFlex LX [Beckman Coulter (BC) Life Science, Indianapolis, IN] using the CytExpert v2.3 (BC) and the Infinicyt softwares (Cytognos SL, Salamanca, Spain) to analyze data.

## References

1. Vives S, Martínez-Cuadrón D, Bergua Burgues J, et al. A phase 3 trial of azacitidine versus a semi-intensive fludarabine and cytarabine schedule in older patients with untreated acute myeloid leukemia. *Cancer*. 2021;127(12):2003–2014.
2. Van Dongen JJM, Lhermitte L, Böttcher S, et al. EuroFlow antibody panels for standardized n-dimensional flow cytometric immunophenotyping of normal, reactive and malignant leukocytes. *Leukemia*. 2012;26(9):1908–1975.
3. Kalina T, Flores-Montero J, Van Der Velden VHJ, et al. EuroFlow standardization of flow cytometer instrument settings and immunophenotyping protocols. *Leukemia*. 2012;26(9):1986–2010.
4. Botta C, Maia C, Garcés JJ, et al. FlowCT for the analysis of large immunophenotypic data sets and biomarker discovery in cancer immunology. *Blood Adv*. 2022;6(2):690–703.



## Supplemental Tables

**Supplemental Table 1.** Description of the antibodies and reagents used in this study.

| Panel | Flow cytometer      | Antigen / Reagent            | Label        | Clone                      | Cat #       | Company                  |
|-------|---------------------|------------------------------|--------------|----------------------------|-------------|--------------------------|
| 1     | FACS Canto II (BDB) | CD4                          | Pacific Blue |                            | B49197      | BC                       |
|       |                     | CD56                         | BV510        | NCAM16.2                   | 563041      | BDB                      |
|       |                     | CD38                         | FITC         | Multi-epitope <sup>1</sup> | CYT-38F2    | Cytognos                 |
|       |                     | CD13                         | PE           | L138                       | 347406      | BDB                      |
|       |                     | CD45                         | PerCP-Cy5.5  | HI-30                      | 304028      | Biolegend                |
|       |                     | Annexin V                    | APC          |                            | ANXVDY-200T | Immunostep               |
|       |                     | CD3                          | APCH7        | SK7                        | 641415      | BDB                      |
| 2     | FACS Canto II (BDB) | Violet proliferation dye 450 | BV421        |                            | C34571      | Thermo Fisher Scientific |
|       |                     | Sytox green                  | FITC         |                            | S7020       | Thermo Fisher Scientific |
|       |                     | CD14                         | PerCP-Cy5.5  |                            | 550787      | BDB                      |
|       |                     | CD300e                       | APC          |                            | IREM2A-100T | Immunostep               |
| 3     | FACS Canto II (BDB) | CD45                         | Pacific Blue |                            |             |                          |

|   |                    |                              |              |                            |                           |                          |
|---|--------------------|------------------------------|--------------|----------------------------|---------------------------|--------------------------|
|   |                    | CD38                         | FITC         | Multi-epitope <sup>1</sup> | CYT-38F2                  | Cytognos                 |
|   |                    | Annexin V                    | PerCP-Cy5.5  |                            |                           |                          |
|   |                    | CD117                        | PE-Cy7       |                            | IB49221                   | BC                       |
|   |                    | CD34                         | APC          | 8G12                       | 345804                    | BDB                      |
|   |                    | Violet proliferation dye 450 | BV421        |                            | C34571                    | Thermo Fisher Scientific |
|   |                    | CD56                         | BV510        | NCAM16.2                   | 563.041                   | BDB                      |
|   |                    | CD38                         | FITC         | 11B6 <sup>2</sup>          | Kindly provided by Sanofi |                          |
| 4 | Omnicyt (Cytognos) | CD45                         | PerCP-Cy5.5  | HI30                       | 304028                    | Biolegend                |
|   |                    | CD69                         | PE-Cy7       | FN50                       | 310912                    | Biolegend                |
|   |                    | Annexin V                    | APC          |                            | ANXVDY-200T               | Immunostep               |
|   |                    | CD3                          | APCH7        | SK7                        | 641415                    | BDB                      |
|   |                    | CD33                         | BUV395       | P676                       | 745709                    | BDB                      |
|   |                    | CD28                         | BUV496       | L293                       | 749972                    | BDB                      |
|   |                    | CD38                         | FITC         | 11B6 <sup>2</sup>          | Kindly provided by Sanofi |                          |
|   |                    | HLA-DR                       | Pacific Blue | L243                       | 307633                    | Biolegend                |
| 5 | CytoFlex XL (BC)   | CD16                         | BV480        | 3G8                        | 566108                    | BDB                      |
|   |                    | CD3                          | BV605        | SK7                        | 563219                    | BDB                      |
|   |                    | CD13                         | BV650        | L138                       | 745350                    | BDB                      |
|   |                    | CD34                         | BB700        | 8G12                       | 746104                    | BDB                      |
|   |                    | CD11b                        | PE           | ICRF44                     | 301306                    | Biolegend                |

|   |                     |                         |               |         |                             |                          |
|---|---------------------|-------------------------|---------------|---------|-----------------------------|--------------------------|
|   |                     | CD117                   | PE-Cy7        |         | B49221                      | BC                       |
|   |                     | CD56                    | APC-<br>AF700 |         | B92446                      | BC                       |
|   |                     | CD45                    | APC-Cy7       | 2D1     | 368516                      | Biolegend                |
|   |                     | Maleimide<br>/ AnnexinV | IR885/<br>APC |         | 129585<br>/ ANXVDY-<br>200T | Sigma<br>/<br>Immunostep |
|   |                     | HLA-DR                  | BUV395        | TU39    | 740302                      | BDB                      |
|   |                     | CD8                     | BUV496        | HIT8A   | 741161                      | BDB                      |
|   |                     | TIM3                    | BB515         | 7D3     | 565568                      | BDB                      |
|   |                     | CD107a                  | BV421         | H4A3    | 328626                      | Biolegend                |
|   |                     | CD16                    | BV480         | 3G8     | 566108                      | BDB                      |
|   |                     | CD3                     | BV605         | SK7     | 563219                      | BDB                      |
|   |                     | TIGIT                   | BV650         | 741182  | 747940                      | BDB                      |
| 6 | CytoFlex XL<br>(BC) | CD137                   | PE            | 4B4-1   | 561701                      | BDB                      |
|   |                     | CD57                    | PCF594        | NK-1    | 562488                      | BDB                      |
|   |                     | CD69                    | PE-Cy7        | FN50    | 310912                      | Biolegend                |
|   |                     | CD38                    | APC           |         | 555462                      | BDB                      |
|   |                     | CD56                    | APC-<br>R700  |         | B92446                      | BC                       |
|   |                     | CD45                    | APC-Cy7       | 2D1     | 368516                      | Biolegend                |
|   |                     | Maleimide               | IR885         |         | 129585                      | Sigma                    |
|   |                     | CD69                    | BUV395        | FN50    | 564364                      | BDB                      |
| 7 | CytoFlex XL<br>(BC) | CD8                     | BUV496        | HIT8A   | 741161                      | BDB                      |
|   |                     | TIGIT                   | BV421         | A15153G | 372709                      | Biolegend                |
|   |                     | CD3                     | BV480         | SK7     | 746437                      | BDB                      |

|        |              |        |        |           |
|--------|--------------|--------|--------|-----------|
| PD1    | BV650        | EH12   | 564104 | BDB       |
| TIM3   | BB515        | 7D3    | 565568 | BDB       |
| CD137  | PE           | 4B4-1  | 561701 | BDB       |
| CD25   | PE-Cy7       | M-A251 | 557741 | BDB       |
| HLA-DR | APC          | L243   | 307610 | Biolegend |
| CD56   | APC-<br>R700 |        | B92446 | BC        |
| CD45   | APC-Cy7      | 2D1    | 368516 | Biolegend |

---

BC: Beckman Coulter (Indianapolis, IN); BDB: Beckton Dickinson Biosciences (San Jose, CA); Biolegend (San Diego, CA); Cytognos SL (Salamanca, Spain); Immunostep SL (Salamanca, Spain); Thermo Fisher Scientific (Waltham, MA); Sigma-Aldrich (St Louis, MO).

<sup>1</sup> This anti-CD38 antibody is multi-epitope and thus less likely to compete with isatuximab or the CD38-TCE for the CD38-binding domain

<sup>2</sup> This anti-CD38 antibody did not compete with isatuximab or the CD38-TCE for the CD38-binding domain.

## Supplemental Figures

### Figure S1. CD38 expression in older patients with acute myeloid leukemia (AML).

(A) Bivariate CD34 vs CD38 dot-plots with merged, patient-matched leukemic cells at diagnosis (in yellow) and at complete response after three induction cycles [i.e., measurable residual disease (MRD)] (in red). CD38 median fluorescence intensity (MFI) in blasts at both stages is indicated with numerical values. (B) CD38 expression in patient-matched leukemic cells at diagnosis and relapse. In this population-band dot-plot graphical representation, each cell is represented by a colored dot (dark-orange: diagnosis; dark-brown: relapse), whereas the MFI is represented by circles and indicated with numerical values.

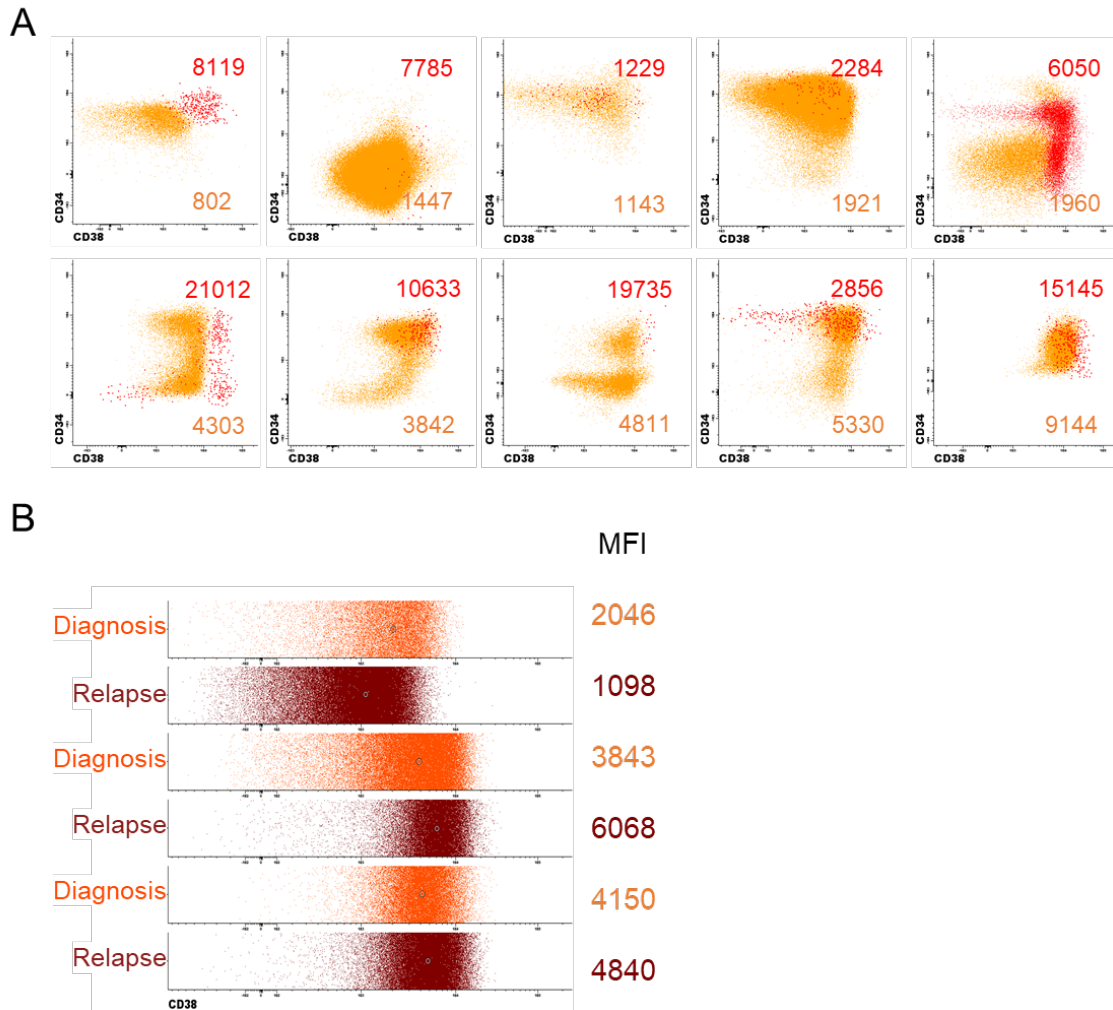

**Figure S2. Effector-cell activation by the CD38/CD3xCD28 trispecific TCE (CD38-TCE).** MOLM-13 cells were pretreated with the CD38-TCE for 30 minutes and cocultured with isolated T- or NK-cells from healthy donors (n=3). After 48 hours, CD69 positivity was assessed by flow cytometry as a readout of effector-cell activation.

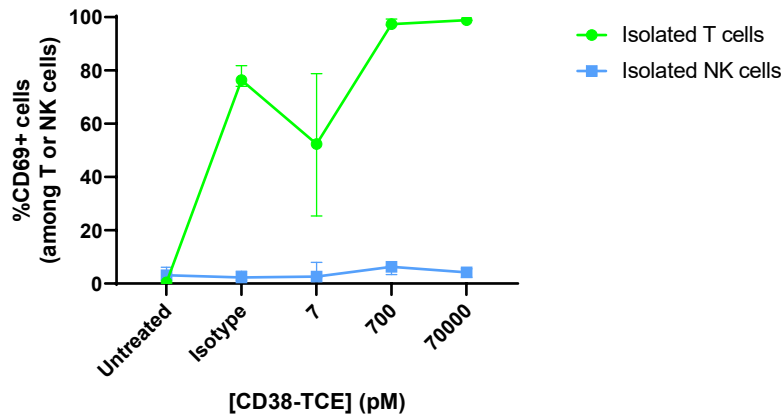

**Figure S3. Relationship between CD38 expression and drug-mediated leukemic blast lysis and target regulation. (A)** Basal CD38 expression in leukemic blasts was measured by flow cytometry in both groups of responders and non-responders to the CD38/CD3xCD28 trispecific TCE (CD38-TCE) and isatuximab. \*,  $P < .05$  **(B)** CD38<sup>lo</sup> (KG-1) and CD38<sup>hi</sup> (MOLM-13 and OCI-AML3) AML cell lines were treated with isatuximab or the CD38-TCE (70 pM). After 24, 48, 72 and 96 hours, CD38 levels were measured and mean fluorescence intensity (MFI) values were normalized to those at baseline.

A

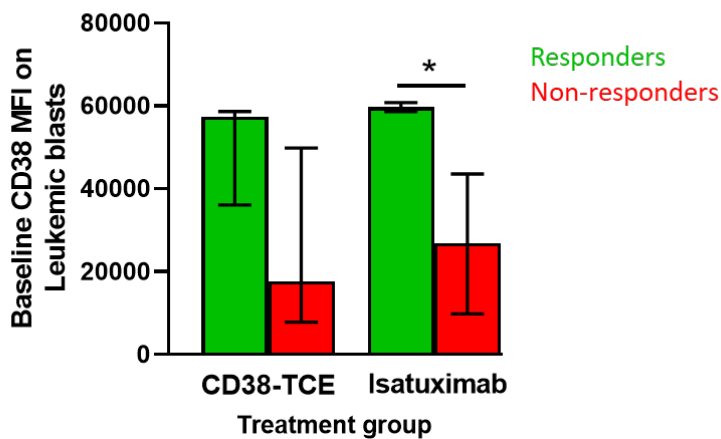

B

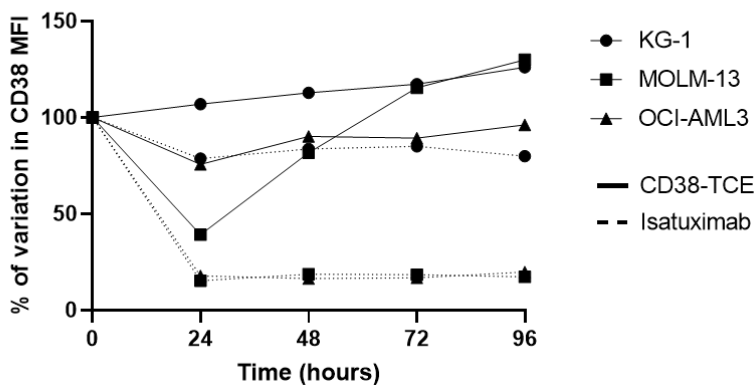

**Figure S4. Correlation between tumor lysis and immune features.** Baseline immune features were correlated with tumor lysis induced ex vivo after 48 hours of treatment with 700 pM isatuximab or the CD38/CD3xCD28 trispecific TCE (CD38-TCE). Red, blue and white colors represent positive, negative and no correlation, respectively (Spearman's coefficient). Asterisks indicate a significant correlation ( $P < .05$ ).

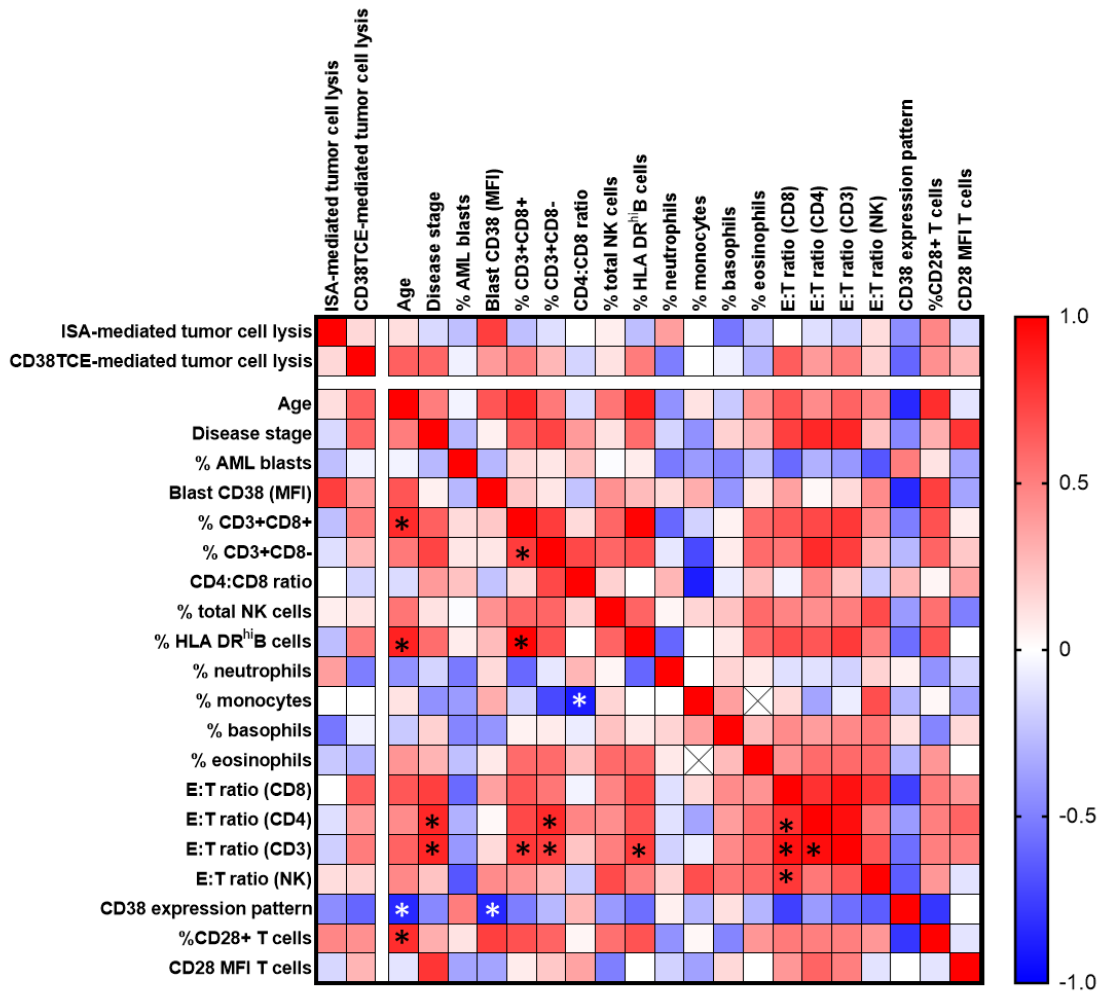



**Figure S5. Lack of association between responsiveness to the CD38/CD3xCD28 trispecific TCE (CD38-TCE) and baseline frequency of CD28<sup>+</sup> T cells in bone marrow microenvironment.** Samples were considered as responders when AML blast lysis observed in the CD38-TCE-treated condition was higher than that observed in the CD38-null TCE-isotype condition (48 hours, 700 pM). Among eight primary samples tested, three responded to the CD38-TCE. ns, non-significant.

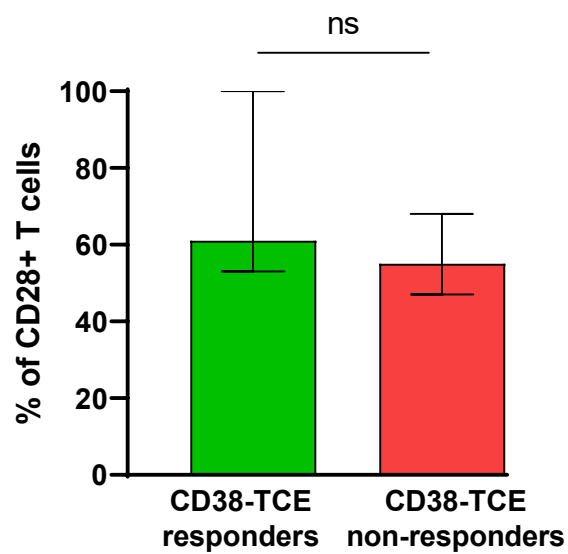

**Figure S6. CD38 expression in AML blasts vs normal cell types.** Using the Infinicyt software (Cytognos, Salamanca, Span), we merged the FCS files of blasts from the AML patients included in this study (N = 241) with various cell types identified in normal bone marrow aspirates from healthy adults (N = 10). The levels of CD38 expression (measured with the clone HB7 conjugated with APCH7; BD Biosciences, San Jose, CA) are represented by population-band histograms, and ordered from the lowest into the highest expression detected among various normal cell types.

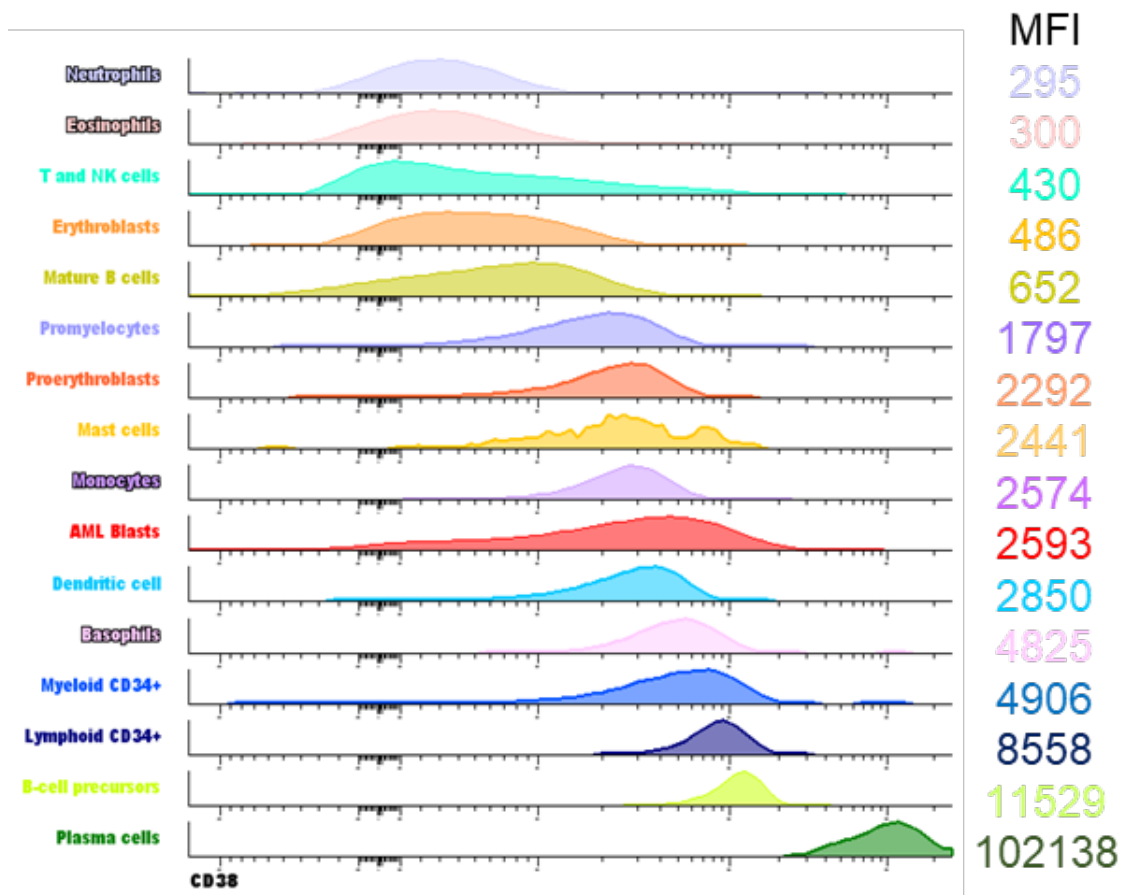

Supplement: BLOODA_ADV-2024-013212-mmc1.pdf [file BLOODA_ADV-2024-013212-mmc1.pdf]
